# Supplementary material
Source: PubMed Central journal article supplement (PMC5047102)
Supplement: supp_pp.16.00925_00925Supplemental_Figure_S3.pdf [file supp_pp.16.00925_00925Supplemental_Figure_S3.pdf]

## Supplemental Figure S3

A

Locus *PpDEK1*Δ*LinkerG3/cre#123*

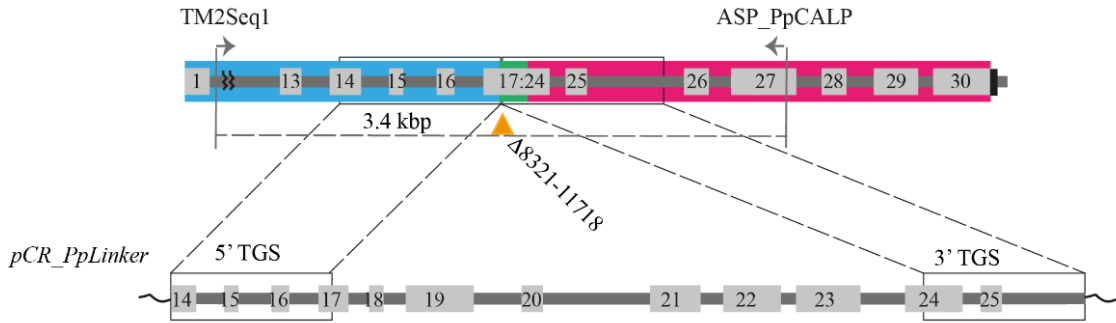

Locus *PpLinker*

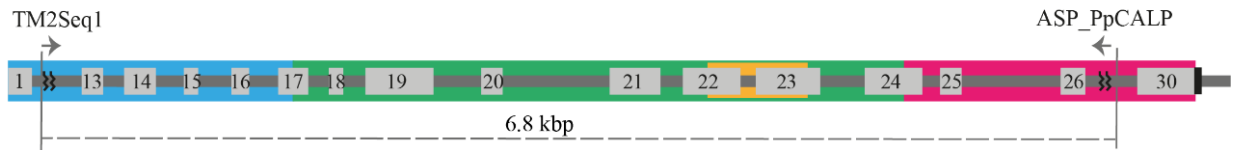

B

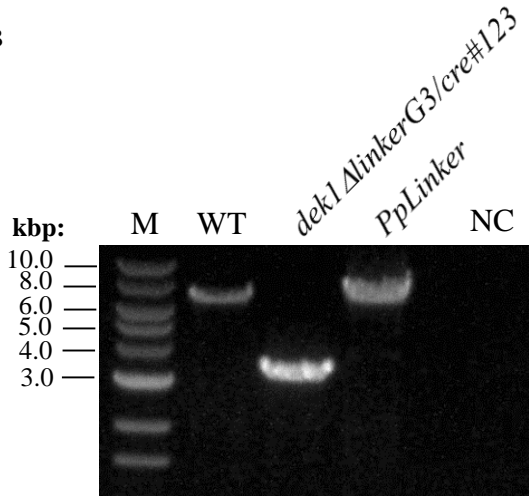

C

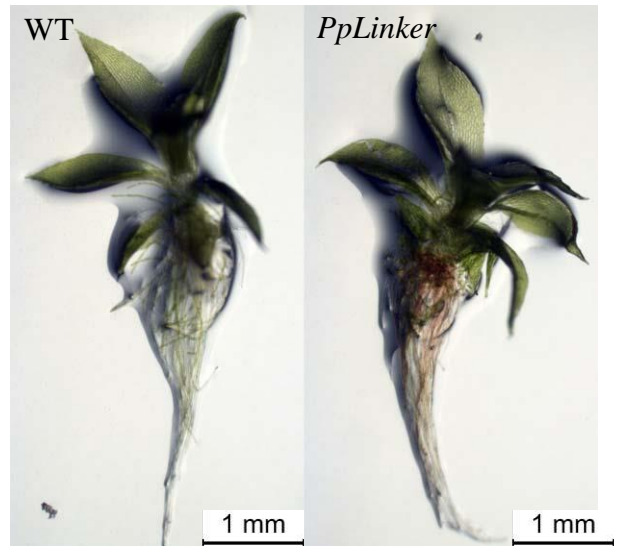

**Supplemental Figure S3.** Vector construction, targeted knock-in of the *Physcomitrella patens* *DEK1* Linker, PCR genotyping and gametophore morphology of complemented line. A, Schematic representation of *Linker* insertion using the *pCR-PpLinker* vector. Blue, green and red highlights represent *DEK1* MEM, Linker and calpain sequences, respectively (for the *DEK1* protein domains, see Figure 1A). The numbers in the grey boxes correspond to the exons of the *P. patens* *DEK1* gene. The 5' and 3' targeting sequences (TGS) are boxed. Annealing sites for primers used for PCR genotyping are shown with arrows (primer sequences can be found in Supplemental Table S3) and the expected band sizes of the PCR amplicons are also given. The yellow triangle with numbers shows the position of the deleted *DEK1* nucleotides. B, PCR genotyping analysis of WT, *dek1*Δ*linkerG3/cre#123* and *PpLinker* using primers *TM2Seq1* and *ASP\_PpCALP* showing amplicons of the expected sizes. M=marker, NC=negative control. C, Gametophores from 16 day old culture, WT on the left, *PpLinker* strain with WT appearance on the right.
