# Supplementary material
Source: PubMed Central journal article supplement (PMC5047102)
Supplement: supp_pp.16.00925_00925Supplemental_Table_S1.pdf [file supp_pp.16.00925_00925Supplemental_Table_S1.pdf]

**Supplemental Table S1.** DEK1-Linker sequences from land plants and charophyte algae used in this study.

| Species                        | Accession                              |
|--------------------------------|----------------------------------------|
| <i>Amborella trichopoda</i>    | XP_006856301.1 <sup>A</sup>            |
| <i>Aquilegia caerulea</i>      | Aquca_009_00510.1 <sup>B</sup>         |
| <i>Arabidopsis lyrata</i>      | XP_002894501.1 <sup>A</sup>            |
| <i>Arabidopsis thaliana</i>    | NP_175932.2 <sup>A</sup>               |
| <i>Beta vulgaris</i>           | XP_010673464.1 <sup>A</sup>            |
| <i>Brachypodium distachyon</i> | XP_003570209.1 <sup>A</sup>            |
| <i>Brassica rapa</i>           | XP_009147506.1 <sup>A</sup>            |
| <i>Camelina sativa</i>         | XP_010481187.1 <sup>A</sup>            |
| <i>Camptotheca acuminata</i>   | GACF01058706.1 <sup>A</sup>            |
| <i>Cannabis sativa</i>         | JP475882.1 <sup>A</sup>                |
| <i>Capsella rubella</i>        | XP_006303131.1 <sup>A</sup>            |
| <i>Capsicum annuum</i>         | JW063188.1 <sup>A</sup>                |
| <i>Carica papaya</i>           | evm.TU.supercontig_119.40 <sup>B</sup> |
| <i>Ceratodon purpureus</i>     | SRS140252 <sup>C</sup>                 |
| <i>Chorispora bungeana</i>     | KA022282.1 <sup>A</sup>                |
| <i>Cicer arietinum</i>         | XP_004504206.1 <sup>A</sup>            |
| <i>Citrus clementina</i>       | XP_006445587.1 <sup>A</sup>            |
| <i>Citrus sinensis</i>         | XP_006488938.1 <sup>A</sup>            |
| <i>Coffea canephora</i>        | CDP18596.1 <sup>A</sup>                |
| <i>Coleochaete orbicularis</i> | This study <sup>D</sup>                |
| <i>Costus pictus</i>           | JW231520.1 <sup>A</sup>                |
| <i>Cucumis melo</i>            | XP_008451014.1 <sup>A</sup>            |
| <i>Cucumis sativus</i>         | Cucsa.142290.1 <sup>B</sup>            |
| <i>Curcuma longa</i>           | JW811525.1 <sup>A</sup>                |
| <i>Elaeis guineensis</i>       | XP_010936786.1 <sup>A</sup>            |
| <i>Erythranthe guttata</i>     | EYU25999.1 <sup>A</sup>                |
| <i>Eucalyptus grandis</i>      | XP_010032857.1 <sup>A</sup>            |
| <i>Eutrema salsugineum</i>     | XP_006392645.1 <sup>A</sup>            |
| <i>Fragaria vesca</i>          | XP_004294954.1 <sup>A</sup>            |
| <i>Glycine max</i>             | XP_003532791.1 <sup>A</sup>            |
| <i>Glycine soja</i>            | KHN06483.1 <sup>A</sup>                |
| <i>Gossypium arboreum</i>      | KHG02979.1 <sup>A</sup>                |
| <i>Gossypium raimondii</i>     | Gorai.003G153800.1 <sup>B</sup>        |
| <i>Hevea brasiliensis</i>      | JT914256.1 <sup>A</sup>                |
| <i>Hordeum vulgare</i>         | ABW81402.1 <sup>B</sup>                |
| <i>Jatropha curcas</i>         | KDP30593.1 <sup>A</sup>                |
| <i>Klebsormidium flaccidum</i> | This study <sup>D</sup>                |
| <i>Lactuca serriola</i>        | JO020465.1 <sup>A</sup>                |
| <i>Linum usitatissimum</i>     | Lus10013411 <sup>B</sup>               |
| <i>Malus domestica</i>         | XP_008351396.1 <sup>A</sup>            |

|                                   |                                 |
|-----------------------------------|---------------------------------|
| <i>Manihot esculenta</i>          | cassava4.1_000045m <sup>B</sup> |
| <i>Marchantia polymorpha</i>      | Mapoly0026s0090.1               |
| <i>Medicago truncatula</i>        | XP_003629937.1 <sup>A</sup>     |
| <i>Mimulus guttatus</i>           | mgv1a000044m <sup>B</sup>       |
| <i>Morus notabilis</i>            | XP_010112666.1 <sup>A</sup>     |
| <i>Mougeotia scalaris</i>         | This study <sup>D</sup>         |
| <i>Musa acuminata</i>             | XP_009403924.1 <sup>A</sup>     |
| <i>Nelumbo nucifera</i>           | XP_010257664.1 <sup>A</sup>     |
| <i>Nicotiana benthamiana</i>      | AAQ55288.2 <sup>A</sup>         |
| <i>Nicotiana sylvestris</i>       | XP_009766184.1 <sup>A</sup>     |
| <i>Nicotiana tomentosiformis</i>  | XP_009619217.1 <sup>A</sup>     |
| <i>Nitella mirabilis</i>          | This study <sup>D</sup>         |
| <i>Oryza brachyantha</i>          | XP_006647780.1 <sup>A</sup>     |
| <i>Oryza sativa</i>               | AAL38190.1 <sup>A</sup>         |
| <i>Panicum virgatum</i>           | Pavirv00022988m <sup>B</sup>    |
| <i>Phaseolus vulgaris</i>         | XP_007159560.1 <sup>A</sup>     |
| <i>Phoenix dactylifera</i>        | XP_008787933.1 <sup>A</sup>     |
| <i>Physcomitrella patens</i>      | XP_001774206.1 <sup>A</sup>     |
| <i>Populus euphratica</i>         | XP_011025140.1 <sup>A</sup>     |
| <i>Populus trichocarpa</i>        | XP_002299263.2 <sup>A</sup>     |
| <i>Prunus mume</i>                | XP_008222910.1 <sup>A</sup>     |
| <i>Prunus persica</i>             | XP_007208412.1 <sup>A</sup>     |
| <i>Pyrus x bretschneideri</i>     | XP_009339183.1 <sup>A</sup>     |
| <i>Ricinus communis</i>           | XP_002523419.1 <sup>A</sup>     |
| <i>Selaginella moellendorffii</i> | XP_002990425.1 <sup>A</sup>     |
| <i>Sesamum indicum</i>            | XP_011089164.1 <sup>A</sup>     |
| <i>Setaria italica</i>            | XP_004984907.1 <sup>A</sup>     |
| <i>Solanum lycopersicum</i>       | Solyc12g100360.1.1 <sup>B</sup> |
| <i>Solanum tuberosum</i>          | XP_006367593.1 <sup>A</sup>     |
| <i>Sorghum bicolor</i>            | XP_002468005.1 <sup>A</sup>     |
| <i>Tarenaya hassleriana</i>       | XP_010534866.1 <sup>A</sup>     |
| <i>Thellungiella halophila</i>    | Thhalv10011175m <sup>B</sup>    |
| <i>Theobroma cacao</i>            | Thecc1EG038725t2 <sup>B</sup>   |
| <i>Thlaspi arvense</i>            | GAKE01002389.1 <sup>A</sup>     |
| <i>Utricularia gibba</i>          | Scf00134.g10074.t1              |
| <i>Vitis vinifera</i>             | XP_002285732.1 <sup>A</sup>     |
| <i>Zea mays</i>                   | NP_001105528.1 <sup>A</sup>     |

<sup>A</sup>NCBI Genbank; <sup>B</sup>Phytozome; <sup>C</sup>Sequence retrieved from the SRS140252 library deposit at NCBI GenBank. Data were produced by the US Department of Energy Joint Genome Institute (<http://www.jgi.doe.gov/>) in collaboration with the user community; <sup>D</sup>Supplemental Data S1, <sup>E</sup>[http://marchantia.info/genome/index.php/Main\\_Page](http://marchantia.info/genome/index.php/Main_Page); <sup>F</sup><http://genomevolution.org/CoGe/>
