# Supplementary material
Source: PubMed Central journal article supplement (PMC5047102)
Supplement: supp_pp.16.00925_00925Supplemental_Table_S3.pdf [file supp_pp.16.00925_00925Supplemental_Table_S3.pdf]

**Supplemental Table S3.** List of oligonucleotide primers and their sequences used in this study.

| <b>Primer name</b> | <b>Oligonucleotide sequence (5' to 3')</b> |
|--------------------|--------------------------------------------|
| SP-A               | GGATCCACGTGCCCAATCTAGCTTTTGTGATGACA        |
| ASP-A              | TTCAATTTTGGGGCGCTTTAATGTAAGCTGTGGCCGGGA    |
| SP-B               | CGCCCCAAAATTGAAACGAAAG                     |
| ASP-B              | TTGGTTTAAACGCCCCTAAAGCGGTTCCAAGATG         |
| SP_PpLinker        | TGACATTACTATTGGTTTACCTCAC                  |
| ASP_PpLinker       | ATAGATACACGACCGGCAG                        |
| SP_Inf1            | CGGTCGTGTATCTATCTTGTCTC                    |
| ASP_Inf1           | ATAGTAATAATGTCATATGCGTACAC                 |
| SP_Inf2            | GAGCAGAATGAGCTGGATATTATGG                  |
| ASP_Inf2           | CAGCTCATTCTGCTCACTATTACGAGGCTCATTGTCCATC   |
| SP_2G_E            | TAGATGATGGAAGATGCTCTTCAGTTTTTGCGAAA        |
| ASP_2G_E           | TTCAATTTTGGGGCGTCGGATCTTCCTGGATAAAT        |
| SP_2G_F            | CGCCCCAAAATTGAAACGAAAG                     |
| ASP_2G_F           | ATCTTCCATCATCTACAAGAACA                    |
| SP_2GDC_Inf        | CGCCCCAAAATTGAAACGA                        |
| ASP_2GDC_Inf       | TTCAATTTTGGGGCGCTCCAGATTAGCACAATTATGCACCA  |
| SP-PpCysPc         | ACCCGGGGCTGTTGAATTGGCT                     |
| ASP-PpC2L          | TCGTACGCTAAAGCGGTTCCAAGATGATAG             |
| SP-PpCysMut0       | GGCCACCTAGGAGATTCTTGTTTTTGTAGTGCA          |
| ASP-PpCysMut0      | AATCTCCTAGGTGGCCCTGCATAACAAGTATAGG         |
| Linker5'-Fw        | GAGGTTCTTTTTGTCTGTCT                       |
| In25-R             | TGGGCTTCCATATATAAATCCGAT                   |
| ArmSeq1            | TGCAAGTTCAGCAGCTCTGC                       |
| ArmSeq3            | TGTTTTAGCACGGCTATTCTTTTC                   |
| SP-AtLG3-Inf       | GAGCCTCGTAATAGTGGTAAACATTGCGGCCAAA         |
| ASP-AtLG3-Inf      | CAGCTCATTCTGCTCAGCCATGCCAATGGCTGC          |
| SP-MpLG3-Inf       | GAGCCTCGTAATAGTCCAAGGCCATGTGGTGTGTC        |
| ASP-MpLG3-Inf      | CAGCTCATTCTGCTCCTCTGCACTGGTACTGCA          |
| ASP_Inf2X          | ACTATTACGAGGCTCATGTCCATC                   |
| SP_Inf_6N          | TGACATTACTATTGGTTTACCTCACATTCATAT          |
| ASP_Inf_6N         | TTATCTCGAGTCGCGGACGACATCAAAACACAC          |
| SP_Inf_5N          | CGCGACTCGAGATAAECTTCG                      |
| ASP_Inf_5N         | ATAGTAATAATGTCATATGCGTACACCT               |
| Δlinker_1F         | CTAGGAATGCCATGTCGGGAACA                    |
| Δlinker_1R         | TGTTCCGATGCAAGACACGTCAT                    |
| Δlinker_2F         | TCTGTGGAGGATCTTACGTGGGC                    |
| Δlinker_2R         | CCCACTCACCTGCATGCATTA                      |
| 35S_rev1           | GGAGCCACCTTCCTTTCCA                        |
| Term_F             | AGGGTTCTTATAGGTTTCGCTCATG                  |
| Ex7-R              | TGGGTCTTCTTCAGTGTGATC                      |
| Ex30-R             | TGTGGTTGGAACAATCGTGTAAC                    |
| gDek1_rev          | AAGACGACTACCACTCAGTGC                      |
| ASP_PpCALP         | TCAATCTCCTCTCCAGCACCT                      |
| ARMseq7            | GCATATTGGGCGTTGAAGCT                       |
| TM2seq1            | TACCTAGGGTGGGCAATTGC                       |
| ARMseq6            | TGCAGGTACCAAAGAAGCAGC                      |
| ASP_PpARM_inf1     | ATAGATACACGACCGGCAG                        |
| Null_1F            | CACTCGCGTGTTCCTTAAGCA                      |
| Null_1R            | GTCAGGCCTCCTTACGTTTCG                      |
| Null_2F            | TTCATAGACGGAGGTTTCGATGGA                   |
| Null_2R            | TGGCACAAAATTGACCAACAAATCT                  |
| TMq_F              | CAAATTGGAGCTGCGATAGAG                      |
| TMq_R              | AAACCTGCTGTAAAAGCGTCA                      |
| RSBq-F             | GTCGACGAGCAGTCGAAGAA                       |
| RSBq-R             | ACTTCTGGAACCGAGAACGG                       |

| Reference to:        | Primer name                                | Oligonucleotide sequence (5' to 3')                     | Name of probe  |
|----------------------|--------------------------------------------|---------------------------------------------------------|----------------|
| Supplemental Fig. S1 | $\Delta$ arm_5' fwd<br>$\Delta$ arm_5' rev | TCTAGCTTTTGTGATGACAGGTTGGC<br>AAACTCGCAACCACTCCCCATC    | 5' TGS probe   |
|                      | $\Delta$ arm_3' fwd<br>$\Delta$ arm_3' rev | GTTTGAGGATTGGAGATATGAT<br>AATGGACTACAAACTGATACG         | 3' TGS probe   |
| Supplemental Fig. S2 | $\Delta$ arm_5' fwd<br>$\Delta$ arm_5' rev | TCTAGCTTTTGTGATGACAGGTTGGC<br>AAACTCGCAACCACTCCCCATC    | 5' TGS probe   |
|                      | 3G_3' fwd<br>3G_3' rev                     | TGATGGAGGGATTCTATTTAATACGGG<br>TATGCGTTCACATATGCAAGCCTT | 3' TGS probe   |
| Supplemental Fig. S4 | ARMseq2<br>$\Delta$ arm_1R                 | GGTTCTTGGTCATGCTACACGA<br>TGTTCCGATGCAAGACACGTCAT       | Internal probe |
| Supplemental Fig. S6 | $\Delta$ arm_5' fwd<br>$\Delta$ arm_5' rev | TCTAGCTTTTGTGATGACAGGTTGGC<br>AAACTCGCAACCACTCCCCATC    | 5' TGS probe   |
|                      | Ex 24F<br>In 25-R                          | AAAGAGGAGGTCTTGCAGCG<br>TGGGCTTCCATATATAAATCCGAT        | 3' TGS probe   |
| Supplemental Fig. S7 | CALPnull_5' Fwd<br>CALPnull_5' Rev         | TGGCTATTAAGGAGGCTTTGGTAGC<br>GGTATCCAGTCGTCAACGACCACA   | 5' TGS probe   |
|                      | CALPnull_3' Fwd<br>CALPnull_3' Rev         | TGATGGAGGGATTCTATTTAATACGGG<br>TATGCGTTCACATATGCAAGCCTT | 3' TGS probe   |
