# Supplementary material
Source: PubMed Central journal article supplement (PMC5047102)

## Supplemental Figure S7

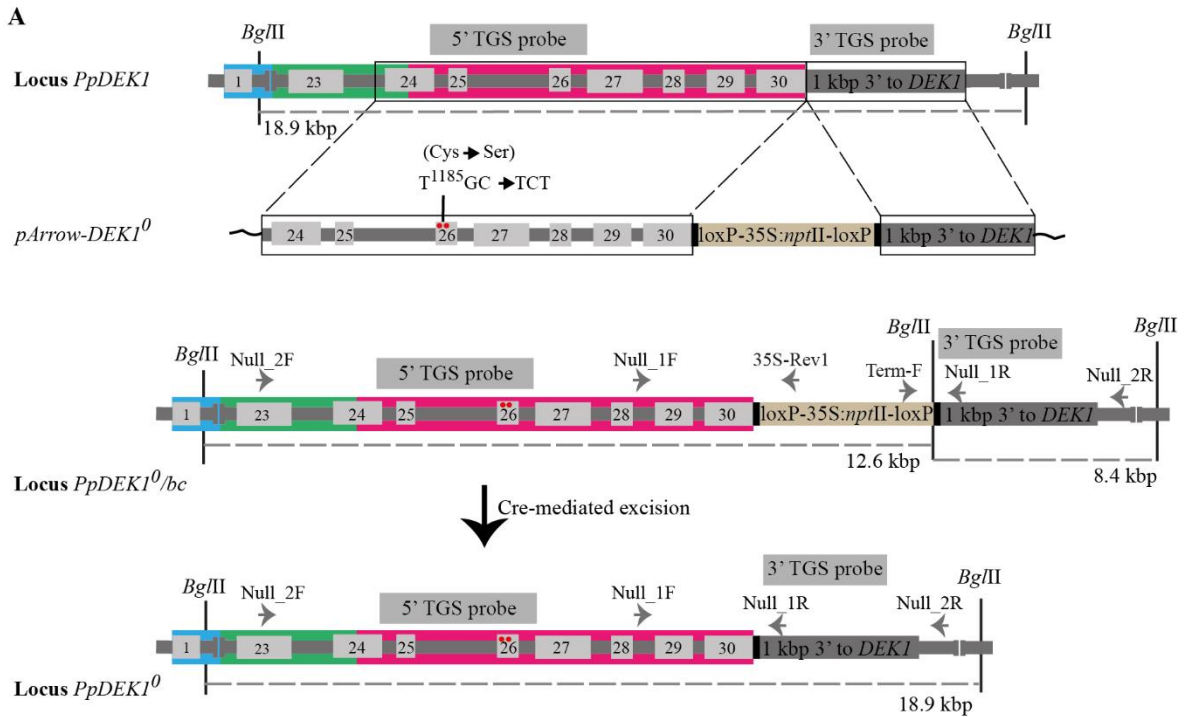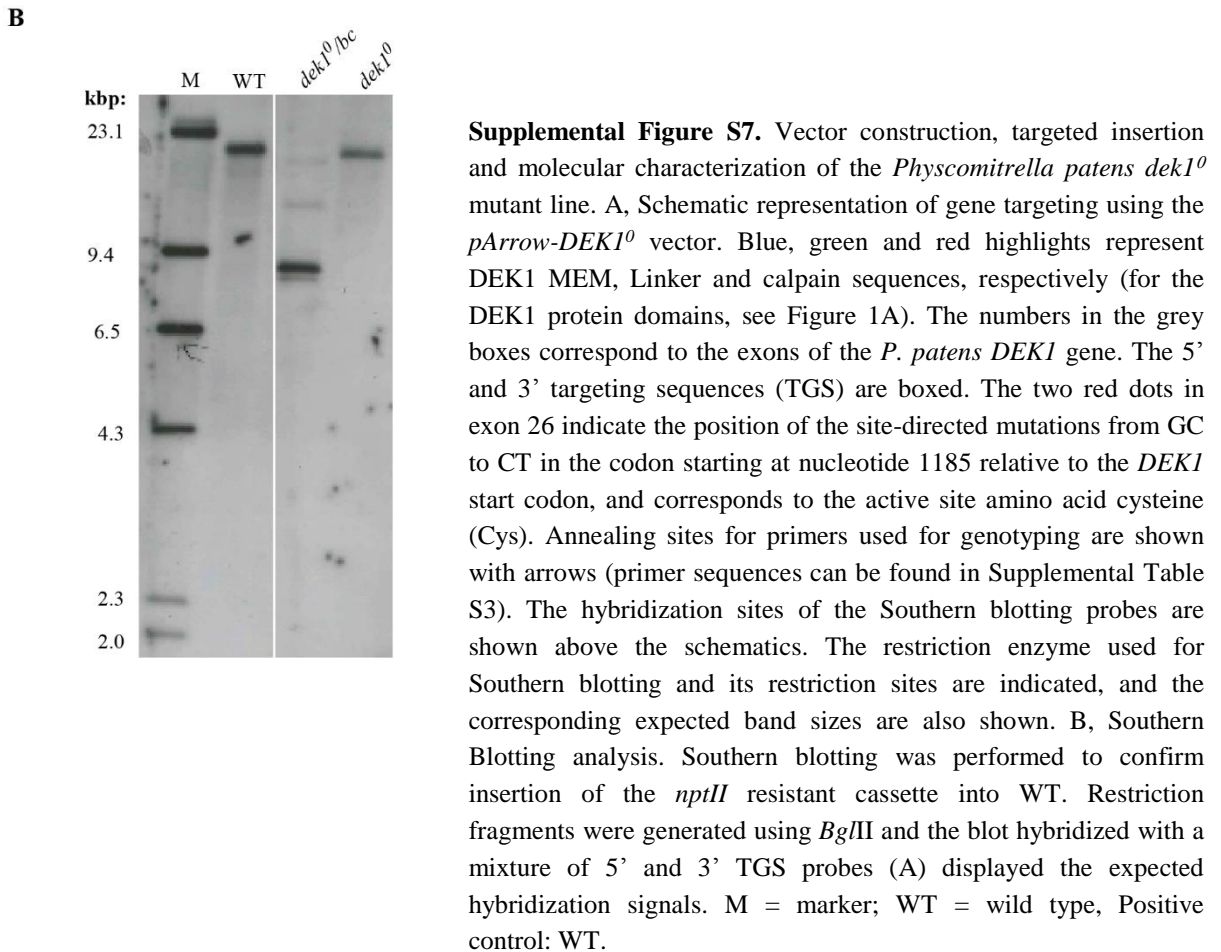

Supplement: supp_pp.16.00925_00925Supplemental_figure_S7.pdf [file supp_pp.16.00925_00925Supplemental_figure_S7.pdf]
